# Supplementary material for: Hexa-Histidine, a Peptide with Versatile Applications in the Study of Amyloid-β(1–42) Molecular Mechanisms of Action
Source: MDPI journal article supplement (doi:10.3390/molecules28207138), 2023-10-17
Supplement: s1 [file s1]

**Supplementary tables with data obtained from models 1-10 clustering as cluster 1-3**

Supplementary Table S1. Selected models of the His6: A $\beta$  peptide complex forming the Cluster 1

| Cluster 1                                                   | Receptor<br>(A $\beta$ peptide)                                                                         | Ligand<br>(His6)                   | H-bond                   | Salt<br>bridges | Binding<br>Energy<br>$\Delta^iG$<br>kcal/mol |
|-------------------------------------------------------------|---------------------------------------------------------------------------------------------------------|------------------------------------|--------------------------|-----------------|----------------------------------------------|
| Model 1                                                     | HIS13, LYS16, LEU17, PHE20, ALA21, VAL24, GLY25, LYS28, ILE31, LEU34, MET35, GLY38, VAL39, ALA42        | HIS1, HIS3, HIS4, HIS5, HIS6       | GLY38:HIS6<br>ALA42:HIS6 | ALA42:<br>HIS6  | -6.6                                         |
| Model 4                                                     | LYS16, LEU17, VAL18, PHE20, ALA21, GLU22, VAL24, GLY25, SER26, LYS28, ILE31, LEU34, MET35               | HIS1, HIS2, HIS3, HIS4, HIS5, HIS6 | LEU17:HIS4<br>ALA21:HIS3 | GLU22:<br>HIS1  | -4.3                                         |
| Model 7                                                     | LYS16, LEU17, VAL18, PHE20, ALA21, GLU22, ASP23, VAL24, GLY25, LYS28, ALA30, ILE31, GLY33, LEU34, MET35 | HIS1, HIS2, HIS3, HIS4, HIS5, HIS6 | ALA21:HIS3               |                 | -6.8                                         |
| Model 8                                                     | HIS13, LYS16, LEU17, VAL18, PHE20, ALA21, VAL24, GLY25, LYS28, ILE31, LEU34, MET35, GLY38, VAL39, ALA42 | HIS1, HIS2, HIS3, HIS4, HIS5, HIS6 | GLY38:HIS3               |                 | -6.6                                         |
| Selected amino acids constituting the interacting interface | LYS16, LEU1, PHE20, ALA21, VAL24, GLY25, LYS2, ILE31, LEU34, MET35,                                     | HIS1, HIS3, HIS4, HIS5, HIS6       |                          |                 | -6.8                                         |

Supplementary Table S2. Selected models of the His6: A $\beta$  peptide complex forming the Cluster 2

| Cluster 2 | Receptor<br>(A $\beta$ peptide)                                                                         | Ligand<br>(His6)                                                       | H-bond                                                          | Salt bridges            | Binding<br>Energy<br>$\Delta^iG$<br>kcal/mol |
|-----------|---------------------------------------------------------------------------------------------------------|------------------------------------------------------------------------|-----------------------------------------------------------------|-------------------------|----------------------------------------------|
| Model 2   | ASP1, ALA2,<br><b>GLU3, HIS6,</b><br><b>ASP7,</b><br><b>TYR10,</b><br><b>HIS14</b>                      | <b>HIS1,</b><br><b>HIS2,</b><br>HIS3,<br>HIS4,<br>HIS5,<br><b>HIS6</b> |                                                                 |                         | -1.4                                         |
| Model 5   | ALA2, <b>GLU3,</b><br><b>HIS6, ASP7,</b><br><b>TYR10,</b><br><b>HIS14,</b> LEU17                        | <b>HIS1,</b><br><b>HIS2,</b><br>HIS3,<br>HIS5,<br><b>HIS6</b>          | HIS6: HIS5<br>HIS6:HIS6<br>GLY9:HIS1<br>GLY9:HIS1<br>TYR10:HIS1 |                         | -4.1                                         |
| Model 9   | <b>GLU3,</b> PHE4,<br><b>HIS6, ASP7,</b><br><b>TYR10,</b><br><b>HIS14,</b><br>GLN15,<br>LEU17,<br>VAL18 | <b>HIS1,</b><br><b>HIS2,</b><br>HIS5,<br><b>HIS6</b>                   | GLU3:HIS5<br>HIS6:HIS5<br>ASP7:HIS6                             | GLU3:HIS6<br>GLU11:HIS2 | <b>-4.8</b>                                  |
| Model 10  | ALA2, <b>GLU3,</b><br><b>HIS6, ASP7,</b><br><b>TYR10,</b><br><b>HIS14</b>                               | <b>HIS1,</b><br><b>HIS2,</b><br>HIS3,<br>HIS4,<br><b>HIS6</b>          | ALA2:HIS3<br>GLU3:HIS2<br>GLU3:HIS1<br>ASP7:HIS2<br>GLY9:HIS6   | GLU3:HIS1<br>ASP7:HIS2  | -3.3                                         |

Selected  
amino acids  
constituting  
the  
interacting  
interface

**GLU3, HIS6,**  
**ASP7,**  
**TYR10,**  
**HIS14**

**HIS1,**  
**HIS2,**  
**HIS6**

**-4.8**

Supplementary Table S3. Selected models of the His6: A $\beta$  peptide complex forming the Cluster 3

| Cluster 3                                                               | Receptor<br>(A $\beta$ peptide)                                       | Ligand<br>(His6)                                  | Binding<br>Energy<br>$\Delta^iG$<br>kcal/mol |                                                    |      |
|-------------------------------------------------------------------------|-----------------------------------------------------------------------|---------------------------------------------------|----------------------------------------------|----------------------------------------------------|------|
| Model 3                                                                 | GLY9,<br>TYR10,<br>VAL12,<br>HIS13,<br>HIS14,<br>LEU17,<br>VAL18      | HIS1,<br>HIS2,<br>HIS3,<br>HIS4,<br>HIS5,<br>HIS6 | TYR10: HIS6<br>HIS14:HIS4                    |                                                    | -2.6 |
| Model 6                                                                 | ASP7, SER8,<br>GLY9,<br>GLU11,<br>VAL12,<br>GLN15,<br>LYS16,<br>PHE19 | HIS1,<br>HIS2,<br>HIS6                            | GLN15:HIS3<br>ASP7:HIS2<br>GLN15:HIS2        | ASP7:HIS2<br>ASP7:HIS2<br>GLU11:HIS2<br>GLU11:HIS2 | -1.7 |
| Selected amino<br>acids<br>constituting the<br>interacting<br>interface | GLY9,<br>VAL18                                                        | HIS1,<br>HIS2,<br>HIS6                            |                                              |                                                    | -2.6 |
